# Supplementary material
Source: publisher figshare collection journal article supplement (https://acs.figshare.com/ndownloader/files/28369428)
Supplement: Supplementary file 1 [file 28369428]

## Supporting Information

### **Bimetallic Au-Ag on Patterned Substrate derived from Discarded Blu-ray discs: Simple, Inexpensive, Stable and Reproducible SERS Substrates**

*Aroonsri Ngamaroonchote, Kullavadee Karn-orachai\**

National Nanotechnology Center (NANOTEC), National Science and Technology Development Agency (NSTDA), Pathum Thani 12120, Thailand

\* Corresponding author. Tel.: +66 2 564 7100

E-mail address: kullavadee.kar@nanotec.or.th

### **Optimization of r-AgBD-ROM substrate fabrication**

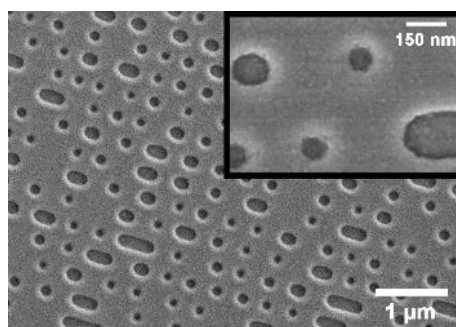

**Figure S1.** FE-SEM images of AgBD-ROM. Insert is an enlarged image.

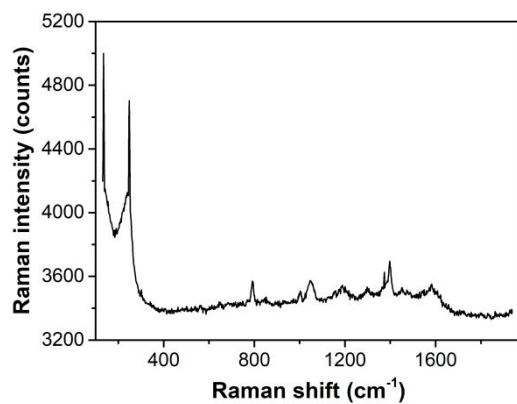

**Figure S2.** Raman spectra background of r-AgBD-ROM.

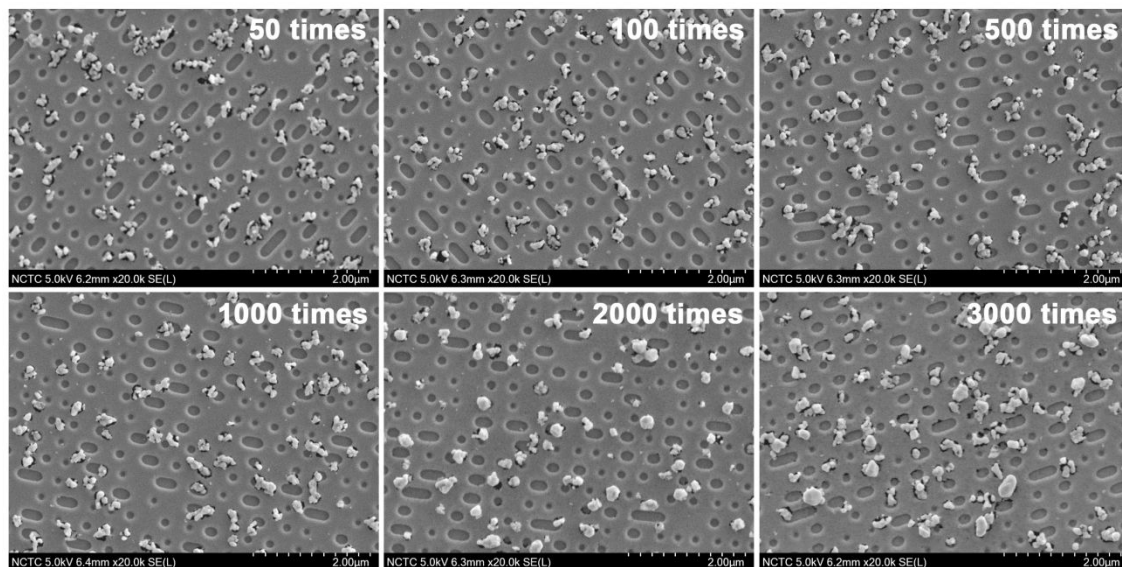

**Figure S3.** FE-SEM images of r-AgBD-ROM fabricated under different the number of step-scan.

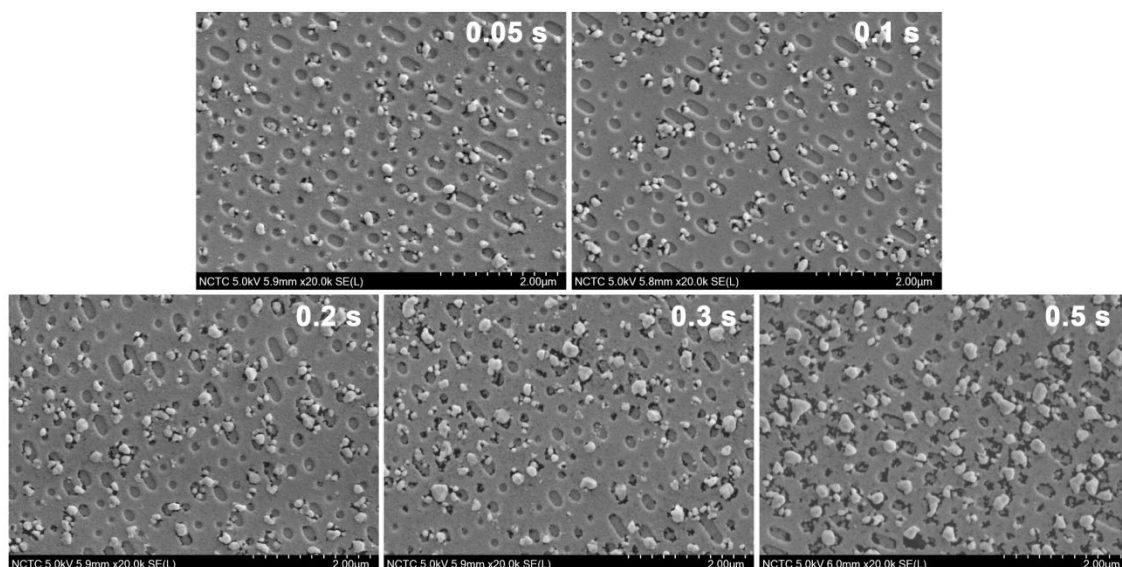

**Figure S4.** FE-SEM images of r-AgBD-ROM fabricated under different duration time.

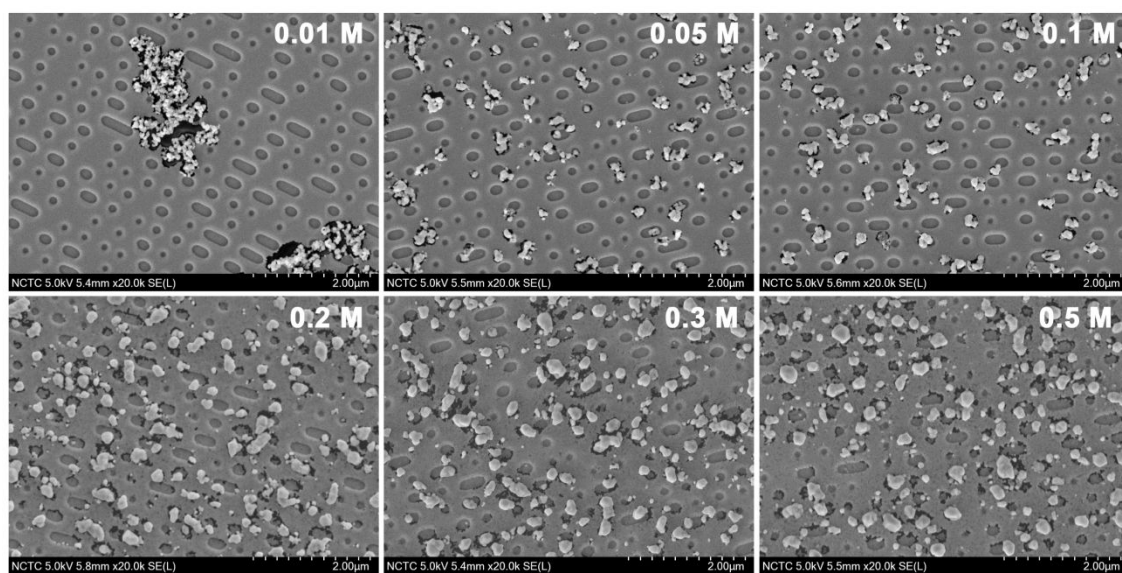

**Figure S5.** FE-SEM images of r-AgBD-ROM fabricated under different KCl concentrations.

## Optimization of Au-r-AgBD-ROM substrate fabrication

The Au-r-AgBD-ROM substrates fabricated under 0, 0.1 and 0.5 mM  $\text{HAuCl}_4$  solution were chosen as representative substrates to investigate particle size and size distribution of AgNPs and Au-AgNPs. The histogram of particle size distribution evaluated from 78-91 particles in SEM images ( $3 \times 3 \mu\text{m}^2$ ) using imageJ software is shown in Figure S6. The average particle size and polydispersity index (PDI) were obtained by Gaussian fitting. The average particle size were  $50 \pm 14.3$ ,  $66.12 \pm 30.12$ , and  $146.62 \pm 81.94$  nm for Au-r-AgBD-ROM fabricated under 0, 0.1 and 0.5 mM  $\text{HAuCl}_4$  solution, respectively. The PDI values were 0.29, 0.46, and 0.56 for Au-r-AgBD-ROM fabricated under 0, 0.1 and 0.5 mM  $\text{HAuCl}_4$  solution, respectively.

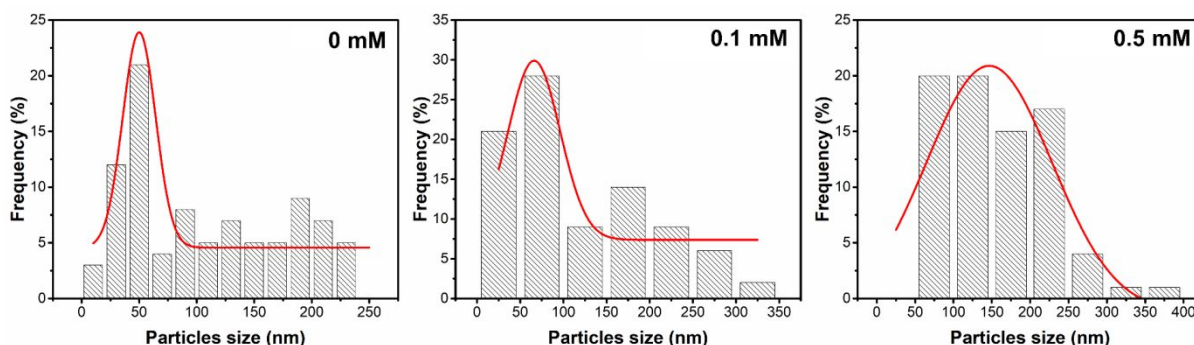

**Figure S6.** Histogram of NPs size distributions on the Au-r-AgBD-ROM fabricated under 0, 0.1 and 0.5 mM  $\text{HAuCl}_4$  solution. The red curves represent a Gaussian fitting.

## Elemental composition analysis of SERS substrates during EC treatment and Au coating methods

**Table S1** The atomic percentage of elements on the as-prepared substrates obtained from XPS measurements

| Peaks | Atomic compositions (%) |
|-------|-------------------------|
|-------|-------------------------|

|                                        | AgBD-ROM | r-AgBD-ROM | Au-r-AgBD-ROM |
|----------------------------------------|----------|------------|---------------|
| Ag3d <sub>3/2</sub> (metal)            | 16.91    | 3.42       | 15.78         |
| Ag3d <sub>5/2</sub> (metal)            | 24.98    | 5.04       | 23.32         |
| Ag3d <sub>3/2</sub> (Ag-O-Ag)          | -        | 6.86       | 4.56          |
| Ag3d <sub>5/2</sub> (Ag-O-Ag)          | -        | 10.13      | 6.74          |
| O1s (C-O)                              | 7.13     | 9.53       | 5.07          |
| O1s (Ag-O-Ag/O-H/Au-O)                 | 10.64    | 7.46       | 2.19          |
| O1s (Absorb with H <sub>2</sub> O)     | -        | 1.54       | 2.19          |
| C1s (C-C)                              | 22.82    | 28.06      | 22.18         |
| C1s (C-O)                              | 8.34     | 17.37      | 8.25          |
| C1s (C=O)                              | 5.59     | 5.99       | 3.07          |
| C1s (O=C-O)                            | 3.59     | 2.43       | 2.25          |
| C1s (shake-up)                         | -        | 2.17       | -             |
| Au4f <sub>5/2</sub> (metal)            | -        | -          | 1.51          |
| Au4f <sub>7/2</sub> (metal)            | -        | -          | 2.01          |
| Au4f <sub>5/2</sub> (Au <sup>+</sup> ) | -        | -          | 0.38          |
| Au4f <sub>7/2</sub> (Au <sup>+</sup> ) | -        | -          | 0.50          |

### Possible model for SERS enhancement phenomenon

**Table S2** Surface roughness (RMS) and surface area of AgBD-ROM and r-AgBD-ROM obtained from AFM measurement.

| substrate | RMS   | Surface area (nm <sup>2</sup> ) |
|-----------|-------|---------------------------------|
| AgBD-ROM  | 2.232 | 25.008                          |

Surface area reported in Table S2 were calculated from S ratio, which represents the ratio between the real interfacial area and scan area ( $5 \times 5 \mu\text{m}^2$ ).

## SERS substrate performance

### *LOD calculation*

The equation used to estimate the limit of detection (LOD) in this study was displayed below.<sup>1</sup>

$$LOD = \frac{I_{avg(blank)} + 1.645(SD_{blank} + SD_{low conc}) - b}{a} \quad (S1)$$

Where  $I_{avg(blank)}$  and  $SD_{blank}$  are the average intensity and the standard deviation of a blank solution (n=10), respectively.  $SD_{low conc}$  is the standard deviation of the low concentration sample.  $a$  and  $b$  are the slope and y-intercept of the sensitivity calibration curve, respectively.

### *EF calculation*

The SERS enhancement factors (EFs) of our SERS substrates were evaluated using methylene blue (MB) as a Raman probe. SERS substrates (r-AgBD-ROM and Au-r-AgBD-ROM) and reference substrate (AgBD-ROM) in the dimension of  $1 \times 1 \text{ cm}^2$  were soaked in 1 mL of 10  $\mu\text{M}$  MB aqueous solutions for overnight and dried in an  $\text{N}_2$  stream. The standard equation used to calculate EFs in this study was displayed below.<sup>2</sup>

$$EF = \frac{I_{SERS}/N_{SERS}}{I_{REF}/N_{REF}} \quad (S2)$$

where  $I_{SERS}$  and  $I_{REF}$  are the average intensities of characteristic Raman peak of MB at  $1628 \text{ cm}^{-1}$  from SERS and reference substrates, respectively, in the same scattering geometry.  $N_{SERS}$  and

$N_{REF}$  are the number of MB molecules absorbed on SERS substrates and reference substrate, respectively.  $N_{SERS}$  and  $N_{REF}$  were calculated by using the following equations:

$$N_{SERS} \text{ or } N_{REF} = C_{absorb} V_{soak} N_A \quad (S3)$$

$$C_{absorb} = C_{soak} - C_{remain} \quad (S4)$$

where  $C_{soak}$ ,  $C_{absorb}$  and  $C_{remain}$  are molar concentrations of MB solution using to soak the substrates ( $10^{-6}$  M), absorbed on the substrates and remaining in solution, respectively.  $V_{soak}$  is the volume (L) of MB solution using to soak the substrates ( $10^{-3}$  L) and  $N_A$  is Avogadro's number ( $6.02 \times 10^{23} \text{ mol}^{-1}$ ).  $C_{remain}$  was examined from the decrease of UV-VIS absorption intensity of remaining MB aqueous solutions. To calculate  $C_{remain}$ , the standard calibration curve of MB in a concentration range of 2 – 10  $\mu\text{M}$  was constructed with UV-VIS absorbance measurements.

The calibration plot constructed from UV-VIS absorbance at 663 nm of MB standard solution (in water) was displayed in Figure S6.  $C_{remain}$  was estimated from the linear regression obtained from the calibration curve ( $y = 0.0862x + 0.0854$ ,  $R^2 = 0.999$ ).  $C_{absorb}$ ,  $N_{SERS}$ , and  $N_{REF}$  can be calculated using Equation S3 and Equation S4. The calculated parametric values of each substrate were reported in Table S3.  $N_{SERS}$  and  $N_{REF}$  calculated from Equation S3 are the number of MB molecules absorbed on the entire area of substrate. MB molecules under irradiated area (5 microns in diameter, area =  $19.625 \times 10^{-8} \text{ cm}^2$ ) on the substrate were also estimated as shown in Table S3. Based on the calculations in Equation S1, EFs from r-AgBD-ROM and Au-r-AgBD-ROM are determined to be  $3.2 \times 10^3$  and  $2.1 \times 10^3$ , respectively.

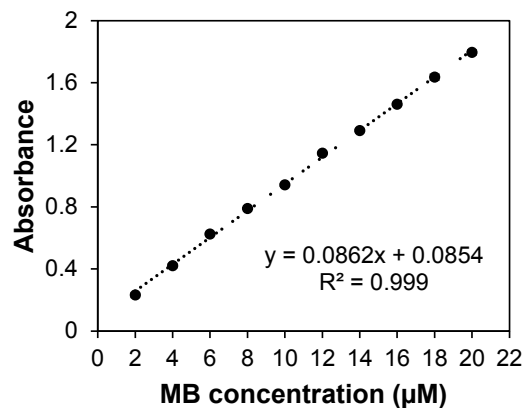

**Figure S7.** The calibration plot constructed from UV-VIS absorbance at 663 nm of MB standard solution (in water).

**Table S3.** The calculated parametric values of each substrate.

| Substrates                     |                       |                       | $N_{SERS}$ or $N_{REF}$ | $N_{SERS}$ or $N_{REF}$ | $I_{SERS}$ or $I_{REF}$ |
|--------------------------------|-----------------------|-----------------------|-------------------------|-------------------------|-------------------------|
|                                | $C_{remain}$          | $C_{absorb}$          | (molecules)             | In scattering           | (counts)                |
|                                | (M)                   | (M)                   |                         | area                    |                         |
|                                |                       |                       |                         | (molecules)             |                         |
| AgBD-ROM                       |                       |                       |                         |                         |                         |
| (reference substrate)          | $7.99 \times 10^{-6}$ | $2.01 \times 10^{-6}$ | $1.21 \times 10^{15}$   | $23.74 \times 10^7$     | 10.39                   |
| r-AgBD-ROM                     |                       |                       |                         |                         |                         |
| (SERS substrate)               | $7.86 \times 10^{-6}$ | $2.14 \times 10^{-6}$ | $1.29 \times 10^{15}$   | $25.32 \times 10^7$     | 35940.21                |
| Au-r-AgBD-ROM (SERS substrate) |                       |                       |                         |                         |                         |
|                                | $7.66 \times 10^{-6}$ | $2.34 \times 10^{-6}$ | $1.41 \times 10^{15}$   | $27.67 \times 10^7$     | 25425.73                |



## SERS practical application

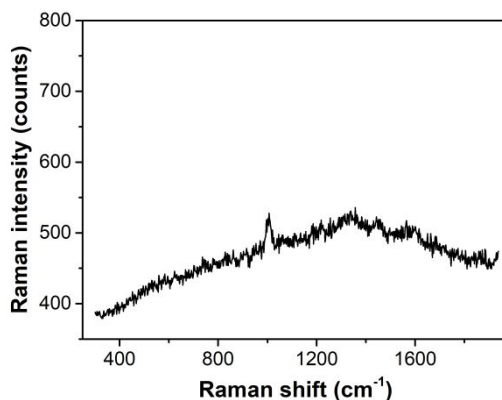

**Figure S8.** Raman spectra of bare Au-r-AgBD-ROM.

**Table S4.** Assignments of main peaks for Raman and SERS spectra of acetaminophen recorded on powder state and the Au-r-AgBD-ROM, respectively.

| Acetaminophen |      |                                                               |
|---------------|------|---------------------------------------------------------------|
| Bulk powder   | SERS | Assignments <sup>3</sup>                                      |
| 1654          |      | amide I                                                       |
| 1613          | 1618 | $\nu$ CC (ring)                                               |
| 1562          | 1567 | $\nu$ CC, $\sigma^{\text{ip}}$ HNC                            |
| 1450          |      | $\sigma^{\text{as}}$ CH <sub>3</sub>                          |
| 1374          |      | $\sigma^{\text{s}}$ CH <sub>3</sub>                           |
| 1328          | 1327 | amide III band ( $\nu$ CN/ $\nu$ CN ( $\emptyset$ )/CNH band) |
| 1260          | 1275 | $\nu$ CO, $\sigma^{\text{ip}}$ HCC, $\nu$ CC                  |
| 1241          | 1244 | $\nu$ CC, $\sigma^{\text{ip}}$ HOC                            |
| 1172          | 1189 | $\sigma^{\text{ip}}$ HCC, $\nu$ CC                            |
| 859           | 859  | $\nu$ CC (ring)                                               |
| 797           |      | $\nu$ CNC (ring)                                              |

**Table S5.** Assignments of main peaks for Raman and SERS spectra of ibuprofen recorded on powder state and the Au-r-AgBD-ROM, respectively.

| <b>Ibuprofen</b>   |             |                                                  |
|--------------------|-------------|--------------------------------------------------|
| <b>Bulk powder</b> | <b>SERS</b> | <b>Assignments<sup>4</sup></b>                   |
| 1610               | 1613        | $\nu_{ip}$ CC <sub>arom</sub>                    |
| 1571               | 1569        | $\nu_{ip}$ CC <sub>arom</sub><br>$\nu_{as}$ COOH |
| 1344               | 1339        | $\omega$ HCH                                     |
| 1210               | 1208        | $\tau$ HCCC <sub>alif</sub>                      |
| 1186               | 1186        | $\tau$ HCCC <sub>alif</sub>                      |
| 1010               | 1010        | $\delta_{ip}$ HCC <sub>arom</sub>                |
| 786                |             | $\delta_{ip}$ CCOOH                              |
| 748                |             | $\delta_{oop}$ CCOOH                             |
| 640                | 644         | $\delta_{oop}$ CCC <sub>arom</sub>               |

**Table S6.** Assignments of main peaks for Raman and SERS spectra of mefenamic acid recorded on powder state and the Au-r-AgBD-ROM, respectively.

| <b>Mefenamic acid</b> |             |                                                                                                          |
|-----------------------|-------------|----------------------------------------------------------------------------------------------------------|
| <b>Bulk powder</b>    | <b>SERS</b> | <b>Assignments<sup>5</sup></b>                                                                           |
| 1626                  |             | $\beta$ NH, $\nu$ CC ( $\emptyset 2$ ), $\beta$ OH + $\nu$ C=O (f)                                       |
| 1605                  | 1605        | $\beta$ NH, $\nu$ CC ( $\emptyset 1$ and $\emptyset 2$ ), $\beta$ OH + $\nu$ C=O                         |
| 1585                  | 1587        | $\beta$ NH (g), $\nu$ CC ( $\emptyset 1$ and $\emptyset 2$ )                                             |
| 1516                  | 1518        | $\nu$ CC ( $\emptyset 2$ ), $\beta$ NH (g)                                                               |
| 1448                  |             | $\beta$ NH, $\beta$ CH ( $\emptyset 1$ and $\emptyset 2$ ), $\delta$ CH <sub>3</sub>                     |
| 1408                  |             | $\beta$ NH, $\nu$ CC ( $\emptyset 1$ and $\emptyset 2$ ), $\beta$ OH + $\nu$ C=O (e)                     |
| 1339                  | 1334        | $\beta$ OH (j), $\nu$ CC ( $\emptyset 2$ )                                                               |
| 1281                  | 1269        | $\beta$ CH in phase ( $\emptyset 1$ , $\emptyset 2$ ), $\nu$ CC ( $\emptyset 1$ ), $\nu$ C8N, $\beta$ NH |
| 1248                  | 1246        | $\beta$ OH, $\beta$ CH in phase ( $\emptyset 1$ , $\emptyset 2$ ), $\nu$ CCOOH                           |
| 1165                  | 1162        | $\beta$ CH ( $\emptyset 2$ )                                                                             |
| 1097                  |             | $\beta$ CH ( $\emptyset 1$ , $\emptyset 2$ ), $\omega$ CH <sub>3</sub>                                   |

|      |      |                                                                                               |
|------|------|-----------------------------------------------------------------------------------------------|
| 1085 | 1085 |                                                                                               |
| 1044 | 1025 | $\nu$ CC ( $\emptyset 2$ )                                                                    |
| 994  |      | $\omega$ CH <sub>3</sub>                                                                      |
| 812  | 817  | $\gamma$ CH in phase ( $\emptyset 1$ ), $\delta$ CCC in phase ( $\emptyset 2$ ), $\beta$ COOH |
| 777  | 786  | $\gamma$ CH in phase ( $\emptyset 1$ ), $\beta$ COOH                                          |
| 705  | 709  | CCC in phase puckering ( $\emptyset 1$ , $\emptyset 2$ ), $\gamma$ CH <sub>3</sub> (C14, C15) |
| 625  | 623  | $\gamma$ NH (k)                                                                               |
| 578  |      | $\delta$ CCC in phase ( $\emptyset 1$ , $\emptyset 2$ )                                       |

---

Abbreviations:  $\emptyset$  = phenyl group,  $\emptyset 1$ ,  $\emptyset 2$  = phenyl group labeled according to Figure 8 in main manuscript,  $\nu$  = stretching,  $\delta$  = bending,  $\beta$  = bending in plane,  $\gamma$  = bending out of plane, r = rocking, w = wagging,  $\tau$  = twisting, s = symmetric, as = antisymmetric

## REFERENCES

1. Karn-orachai, K.; Sakamoto, K.; Laocharoensuk, R.; Bamrungsap, S.; Songsivilai, S.; Dharakul, T.; Miki, K., Extrinsic surface-enhanced Raman scattering detection of influenza A virus enhanced by two-dimensional gold@silver core-shell nanoparticle arrays. *RSC Advances* **2016**, *6* (100), 97791-97799.
2. Le Ru, E. C.; Blackie, E.; Meyer, M.; Etchegoin, P. G., Surface Enhanced Raman Scattering Enhancement Factors: A Comprehensive Study. *The Journal of Physical Chemistry C* **2007**, *111* (37), 13794-13803.
3. Shende, C.; Smith, W.; Brouillette, C.; Farquharson, S., Drug stability analysis by Raman spectroscopy. *Pharmaceutics* **2014**, *6* (4), 651-62.

4. Di Foggia, M.; Bonora, S.; Tinti, A.; Tugnoli, V., DSC and Raman study of DMPC liposomes in presence of Ibuprofen at different pH. *Journal of Thermal Analysis and Calorimetry* **2016**, *127* (2), 1407-1417.
5. Cunha, V. R.; Izumi, C. M.; Petersen, P. A.; Magalhaes, A.; Temperini, M. L.; Petrilli, H. M.; Constantino, V. R., Mefenamic acid anti-inflammatory drug: probing its polymorphs by vibrational (IR and Raman) and solid-state NMR spectroscopies. *J Phys Chem B* **2014**, *118* (16), 4333-44.
